# Supplementary material for: Rapid IRMPD (InfraRed multiple photon dissociation) analysis for glycomics
Source: Royal Society of Chemistry journal article supplement (doi:10.1039/d1an01870a), 2021-12-07
Supplement: d1an01870a1.pdf [file d1an01870a1.pdf]

Electronic Supplementary Material

**Rapid IRMPD (InfraRed Multiple Photon Dissociation) analysis for glycomics**

Oznur Yeni,<sup>a</sup> Baptiste Schindler,<sup>a</sup> Baptiste Moge<sup>a</sup> and Isabelle Compagnon<sup>\*a</sup>

a. Université de Lyon, CNRS, Université Claude Bernard Lyon 1, CNRS, Institut Lumière Matière, F-69622 Lyon, France. E-mail : [isabelle.compagnon@univ-lyon1.fr](mailto:isabelle.compagnon@univ-lyon1.fr)

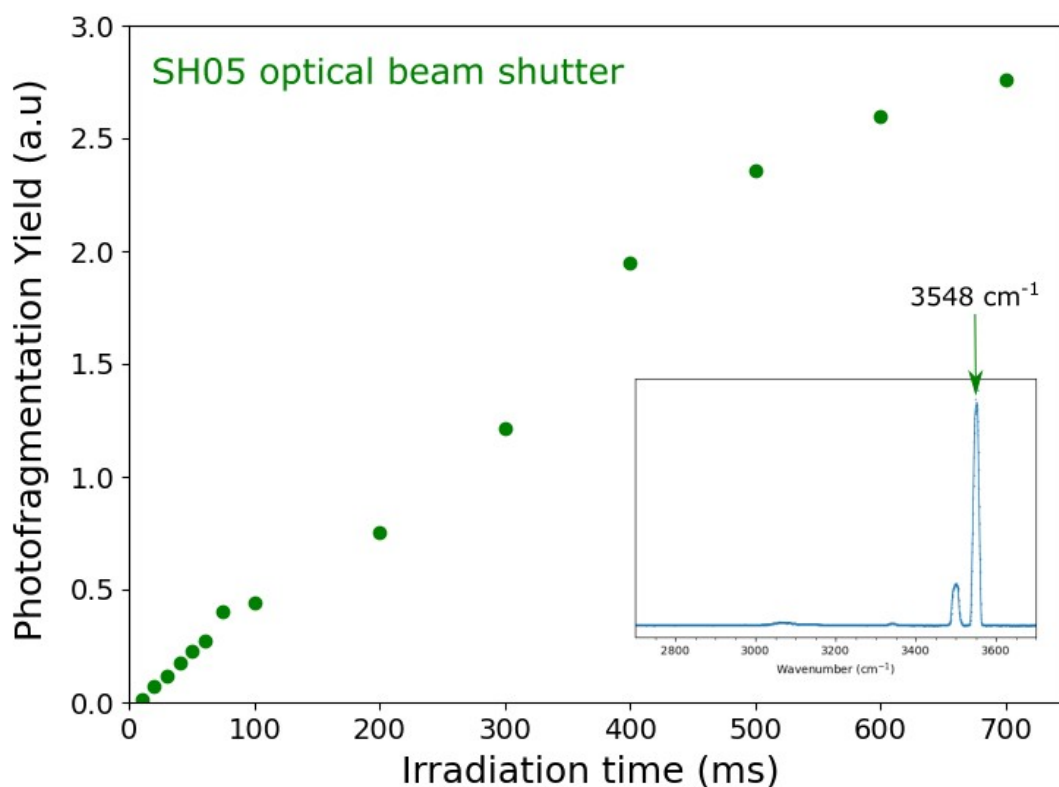

Figure S1: Photofragmentation yield of protonated tryptophan at 3548 cm<sup>-1</sup> as a function of irradiation time. Inset: IRMPD spectrum of protonated tryptophan the band marked by an arrow at 3548 cm<sup>-1</sup> correspond to an OH vibration mode. A ThorLabs SH05 optical beam shutter controlled by a ThorLabs SC10 - Optical Beam Shutter Controller was used to conduct this photofragmentation study.

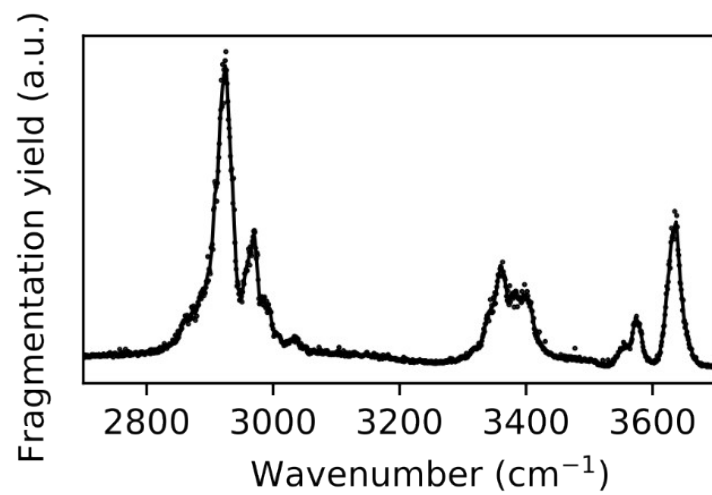

Figure S2: IRMPD spectrum of a neutral hexose (methyl- $\beta$ -D-galactopyranoside) complexed with a  $\text{NH}_4^+$  adduct, obtained with the kHz tunable laser
